# Supplementary material for: Association between dietary quality and accelerated aging: a cross-sectional study of two cohorts
Source: Royal Society of Chemistry journal article supplement (doi:10.1039/d4fo02360a), 2024-01-01
Supplement: d4fo02360a1.pdf [file d4fo02360a1.pdf]

## Association Between Dietary Quality and Accelerated Aging: A Cross-Sectional Study of Two Cohorts

**Table. S1** AHA Dietary Score

| Food composition     | Condition for scoring | Score |
|----------------------|-----------------------|-------|
| Fruit and vegetables | Daily intake          | 1     |
| Fish                 | Daily intake          | 1     |
| Salt                 | <6 g/d                | 1     |
| Whole grain          | Daily intake          | 1     |
| Sugary drink         | No or minimal intake  | 1     |
| Total                |                       | 5     |

**Table. S2** Modified AHA Dietary Score

| Food composition     | Condition for scoring | Score |
|----------------------|-----------------------|-------|
| Fruit and vegetables | Daily intake          | 1     |
| Fish                 | Daily intake          | 1     |
| Salt                 | 6-10 g/d              | 1     |
| Whole grain          | Daily intake          | 1     |
| Sugary drink         | No or minimal intake  | 1     |
| Total                |                       | 5     |

**Table. S3** In the Kailuan cohort, participants were stratified according to AHA dietary scores at baseline.

|                 | Overall       | Score (0-2)   | Score (3-5)   | P-value |
|-----------------|---------------|---------------|---------------|---------|
| N               |               | 22807         | 10894         |         |
| Sex, n (%)      |               |               |               | <0.001  |
| Woman           | 9188 (27.3)   | 6487 (28.4)   | 2701 (24.8)   |         |
| Man             | 24513 (72.7)  | 16320 (71.6)  | 8193 (75.2)   |         |
| Age             | 57.29 (11.88) | 57.22 (11.50) | 57.43 (71.76) | 0.675   |
| Marriage, n (%) |               |               |               | 0.981   |
| Married         | 32086 (95.2)  | 1092 (4.8)    | 523 (4.8)     |         |
| Other           | 1615 (4.8)    | 21715 (95.2)  | 10371 (95.2)  |         |
| Income, n (%)   |               |               |               | <0.001  |
| High            | 5276 (15.7)   | 4213 (18.5)   | 1063 (9.8)    |         |
| Low             | 28425 (84.3)  | 18594 (81.5)  | 9831 (90.2)   |         |
| Smoke, n (%)    |               |               |               | <0.001  |
| Never           | 27641 (82.0)  | 3943 (17.3)   | 2117 (19.4)   |         |

|                                        |                        |                         |                         |        |
|----------------------------------------|------------------------|-------------------------|-------------------------|--------|
| Current and past Alcohol intake, n (%) | 6060 (18.0)            | 18864 (82.7)            | 8777 (80.6)             | <0.001 |
| No                                     | 20293 (60.2)           | 5981 (26.2)             | 7427 (68.2)             |        |
| Yes                                    | 13408 (39.8)           | 16826 (73.8)            | 3467 (31.8)             |        |
| Physical exercise, n (%)               |                        |                         |                         | <0.001 |
| No                                     | 2314 (6.9)             | 1401 (6.1)              | 913 (8.4)               |        |
| Sometimes                              | 26448 (78.5)           | 18349 (80.5)            | 8099 (74.3)             |        |
| Often                                  | 4939 (14.7)            | 3057 (13.4)             | 1882 (17.3)             |        |
| Sedentary lifestyle, n (%)             |                        |                         |                         | <0.001 |
| No                                     | 24322 (72.2)           | 15818 (69.4)            | 8504 (78.1)             |        |
| Yes (>4 h/d)                           | 9379 (27.8)            | 6989 (30.6)             | 2390 (21.9)             |        |
| Sleep duration, n (%)                  |                        |                         |                         | <0.001 |
| 7-8 hours/day                          | 23560 (69.9)           | 15608 (68.4)            | 7952 (73.0)             |        |
| <7 and >8 hours/day                    | 10141 (30.1)           | 7199 (31.6)             | 2942 (27.0)             |        |
| Hypertension, n (%)                    |                        |                         |                         | <0.001 |
| No                                     | 28073 (83.3)           | 18198 (79.8)            | 9875 (90.6)             |        |
| Yes                                    | 5628 (16.7)            | 4609 (20.2)             | 1019 (9.4)              |        |
| Diabetes, n (%)                        |                        |                         |                         | <0.001 |
| No                                     | 32077 (95.2)           | 21485 (94.2)            | 10592 (97.2)            |        |
| Yes                                    | 1624 (4.8)             | 1322 (5.8)              | 302 (2.8)               |        |
| UA (mg/dl)                             | 326.00 [272.20,386.00] | 331.00 [277.00, 393.00] | 315.00 [263.68, 373.00] | <0.001 |

**Notes:** Continuous variables were presented as mean  $\pm$  standard deviation (SD). Continuous variables that were not normally distributed were expressed as the median [interquartile range]. Categorical variables were presented as numbers and percentages. Differences in normally and non-normally distributed baseline characteristics were compared using the chi-square test or t-test and Wilcoxon rank sum test, respectively. Income referred to the annual household income, which was divided into two groups based on the median: high and low.

Abbreviations: UA, Uric acid.

**Table. S4** Baseline characteristics of NHANES cohort participants stratified by quartiles of HEI-2015 scores.

|                     | Overall       | Q1            | Q2            | Q3            | Q4            | P-value |
|---------------------|---------------|---------------|---------------|---------------|---------------|---------|
| n                   | 9285          | 2331          | 2365          | 2329          | 2260          |         |
| Sex = Male (%)      | 4590 (49.4)   | 1237 (53.1)   | 1219 (51.5)   | 1134 (48.7)   | 1000 (44.2)   | <0.001  |
| Age (mean (SD))     | 49.83 (17.62) | 45.24 (16.95) | 48.44 (17.49) | 50.84 (17.58) | 54.97 (17.03) | <0.001  |
| Education = low (%) | 4819 (51.9)   | 1422 (61.0)   | 1270 (53.7)   | 1161 (49.8)   | 966 (42.7)    | <0.001  |
| Marry = Other (%)   | 4358 (46.9)   | 1214 (52.1)   | 1154 (48.8)   | 1044 (44.8)   | 946 (41.9)    | <0.001  |

|                           |              |              |              |              |              |        |
|---------------------------|--------------|--------------|--------------|--------------|--------------|--------|
| Income = low (%)          | 4646 (50.0)  | 1345 (57.7)  | 1214 (51.3)  | 1122 (48.2)  | 965 (42.7)   | <0.001 |
| DM (%)                    |              |              |              |              |              | 0.575  |
| Yes                       | 1327 (14.3)  | 321 (13.8)   | 333 (14.1)   | 338 (14.5)   | 335 (14.8)   |        |
| No                        | 7958 (84.7)  | 2010 (86.3)  | 1888 (85.9)  | 1991 (85.5)  | 1925 (85.2)  |        |
| Hypertension = yes (%)    | 3252 (35.0)  | 738 (31.7)   | 813 (34.4)   | 822 (35.3)   | 879 (38.9)   | <0.001 |
| UA (mean (SD))            | 5.51 (1.43)  | 5.56 (1.45)  | 5.54 (1.43)  | 5.52 (1.42)  | 5.43 (1.42)  | 0.015  |
| Smoke (%)                 |              |              |              |              |              | <0.001 |
| Current and past          | 2153 (23.2)  | 619 (26.6)   | 560 (23.7)   | 540 (23.2)   | 434 (19.2)   |        |
| Never                     | 2345 (25.3)  | 536 (23.0)   | 583 (24.7)   | 603 (25.9)   | 623 (27.6)   |        |
| Unknown                   | 4787 (51.6)  | 1176 (50.5)  | 1222 (51.7)  | 1186 (50.9)  | 1203 (53.2)  |        |
| Alcohol intake= yes (%)   | 5922 (63.8)  | 1459 (62.6)  | 1528 (64.6)  | 1495 (64.2)  | 1440 (63.7)  | 0.512  |
| Physical activity (%)     |              |              |              |              |              | <0.001 |
| Often                     | 1157 (12.5)  | 227 (9.7)    | 273 (11.5)   | 312 (13.4)   | 345 (15.3)   |        |
| Sometimes                 | 3089 (33.3)  | 691 (29.7)   | 751 (31.7)   | 784 (33.6)   | 863 (38.2)   |        |
| No                        | 5039 (54.3)  | 1413 (60.6)  | 1341 (56.7)  | 1233 (52.9)  | 1052 (46.5)  |        |
| Depression (%)            |              |              |              |              |              | <0.001 |
| No                        | 7890 (85.0)  | 1912 (82.0)  | 1980 (83.7)  | 2007 (86.2)  | 1991 (88.1)  |        |
| Unknown                   | 573 (6.2)    | 142 (6.1)    | 148 (6.3)    | 144 (6.2)    | 139 (6.2)    |        |
| Yes                       | 822 (8.9)    | 277 (11.9)   | 237 (10.0)   | 178 (7.6)    | 130 (5.8)    |        |
| BMI (mean (SD))           | 29.08 (6.69) | 29.73 (7.27) | 29.30 (6.74) | 28.95 (6.54) | 28.30 (6.04) | <0.001 |
| sleep <7/>8 hours/day (%) | 4383 (47.2)  | 1211 (52.0)  | 1162 (49.1)  | 1039 (44.6)  | 971 (43.0)   | <0.001 |

**Notes:** Continuous variables were presented as mean  $\pm$  standard deviation (SD). Continuous variables that were not normally distributed were expressed as the median [interquartile range]. Categorical variables were presented as numbers and percentages. Differences in normally and non-normally distributed baseline characteristics were compared using the chi-square test or t-test and Wilcoxon rank sum test, respectively. Income referred to the annual household income, which was divided into two groups based on the median: high and low.

Abbreviations: DM, diabetes mellitus; UA, Uric acid (mg/dl); BMI, body mass index.

**Table. S5** Association of food composition and accelerated aging in the AHA dietary score (Kailuan cohort, n=33701).

|                                          | Model A          |                | Model B          |                | Model C          |                |
|------------------------------------------|------------------|----------------|------------------|----------------|------------------|----------------|
|                                          | OR (95% CI)      | <i>P-value</i> | OR (95% CI)      | <i>P-value</i> | OR (95% CI)      | <i>P-value</i> |
| Component 1<br>(fruit and<br>vegetables) | 0.70 (0.64-0.75) | <0.001         | 0.66 (0.61-0.72) | <0.001         | 0.73 (0.67-0.79) | <0.001         |
| Component 2<br>(fish)                    | 1.14 (0.97-1.33) | 0.117          | 0.98 (0.83-1.15) | 0.784          | 1.11 (0.94-1.31) | 0.194          |
| Component 3<br>(salt)                    | 1.28 (1.15-1.42) | <0.001         | 1.23 (1.11-1.37) | <0.001         | 1.18 (1.06-1.31) | 0.003          |
| Component 4<br>(whole grain)             | 0.69 (0.63-0.74) | <0.001         | 0.67 (0.61-0.73) | <0.001         | 0.72 (0.66-0.79) | <0.001         |
| Component 5<br>(soft drink)              | 0.87 (0.81-0.93) | <0.001         | 0.81 (0.74-0.88) | <0.001         | 0.95(0.86-1.04)  | 0.276          |

**Notes:** Data are presented as odds ratios (95% confidence intervals). Model A: unadjusted; Model B: adjusted for sex (men/women), marriage (married/other), income (low/high), smoke (no/current and past), alcohol intake (yes/no), sedentary lifestyle(yes/no), physical activity(no/sometimes/often), and sleep duration(7-8 hours/<7 or >8 hours); Model C: additionally adjusted for diabetes and hypertension based on Model B. OR, odds ratio; CI, confidence interval; *P-value*, probability.

**Table. S6** Association between salt intake and accelerated aging (Kailuan cohort, n=33701)

|          | Case/N     | Model A          |                | Model B          |                | Model C          |                |
|----------|------------|------------------|----------------|------------------|----------------|------------------|----------------|
|          |            | OR (95% CI)      | <i>P-value</i> | OR (95% CI)      | <i>P-value</i> | OR (95% CI)      | <i>P-value</i> |
| 6-10 g/d | 2683/28157 | Ref.             |                | Ref.             |                | Ref.             |                |
| <6 g/d   | 451/3587   | 1.34 (1.21-1.49) | <0.001         | 1.28 (1.15-1.43) | <0.001         | 1.22 (1.09-1.36) | <0.001         |
| >10 g/d  | 294/1957   | 1.65 (1.45-1.88) | <0.001         | 1.48 (1.30-1.69) | <0.001         | 1.34 (1.17-1.54) | <0.001         |

**Notes:** Data are presented as odds ratios (95% confidence intervals). Model A: unadjusted; Model B: adjusted for sex (men/women), marriage (married/other), income (low/high), smoke (no/current and past), alcohol intake (yes/no), sedentary lifestyle(yes/no), physical activity(no/sometimes/often), and sleep duration(7-8 hours/<7 or >8 hours); Model C: additionally adjusted for diabetes and hypertension based on Model B. OR, odds ratio; CI, confidence interval; *P-value*, probability.

**Table. S7** Stratified Analysis of the association between HEI-2015 dietary scores and accelerated aging in the NHANES Cohort

|          | Case/N   | OR (95%CI)       | p for interaction |
|----------|----------|------------------|-------------------|
| Sex      |          |                  | 0.033             |
| Men      |          |                  |                   |
| Q2       | 344/1219 | 1.17 (0.89,1.54) |                   |
| Q3       | 243/1134 | 0.67 (0.48,0.94) |                   |
| Q4       | 203/1000 | 0.62 (0.43,0.88) |                   |
| Women    |          |                  |                   |
| Q2       | 252/1146 | 1.02 (0.73,1.40) |                   |
| Q3       | 230/1195 | 0.88 (0.62,1.25) |                   |
| Q4       | 202/1260 | 0.70 (0.49,1.02) |                   |
| Age      |          |                  | 0.168             |
| <65      |          |                  |                   |
| Q2       | 381/1833 | 1.06 (0.84,1.35) |                   |
| Q3       | 293/1734 | 0.73 (0.54,0.99) |                   |
| Q4       | 209/1502 | 0.56 (0.39,0.80) |                   |
| ≥65      |          |                  |                   |
| Q2       | 215/532  | 1.28 (0.93,1.78) |                   |
| Q3       | 180/595  | 0.92 (0.62,1.36) |                   |
| Q4       | 196/758  | 0.90 (0.68,1.20) |                   |
| Marriage |          |                  | 0.194             |
| married  |          |                  |                   |
| Q2       | 275/1211 | 1.20 (0.87,1.65) |                   |
| Q3       | 233/1285 | 0.84 (0.56,1.25) |                   |
| Q4       | 215/1314 | 0.61 (0.43,0.86) |                   |
| Other    |          |                  |                   |
| Q2       | 321/1154 | 1.02 (0.77,1.33) |                   |
| Q3       | 240/1044 | 0.72 (0.51,1.01) |                   |
| Q4       | 190/946  | 0.77 (0.55,1.07) |                   |
| Income   |          |                  | 0.082             |
| Low      |          |                  |                   |
| Q2       | 430/1546 | 1.01 (0.8,1.29)  |                   |
| Q3       | 330/1478 | 0.72 (0.55,0.95) |                   |
| Q4       | 263/1269 | 0.64 (0.5,0.82)  |                   |
| High     |          |                  |                   |
| Q2       | 166/819  | 1.3 (0.87,1.94)  |                   |

|                   |    |          |                  |        |
|-------------------|----|----------|------------------|--------|
|                   | Q3 | 143/851  | 0.9 (0.59,1.35)  |        |
|                   | Q4 | 142/991  | 0.81 (0.53,1.26) |        |
| Smoke             |    |          |                  | <0.001 |
| Never             |    |          |                  |        |
|                   | Q2 | 436/1805 | 1.15 (0.89,1.48) |        |
|                   | Q3 | 344/1789 | 0.86 (0.64,1.15) |        |
|                   | Q4 | 313/1826 | 0.74 (0.58,0.94) |        |
| Current and past  |    |          |                  |        |
|                   | Q2 | 160/560  | 0.99 (0.66,1.50) |        |
|                   | Q3 | 129/540  | 0.52 (0.35,0.77) |        |
|                   | Q4 | 92/434   | 0.46 (0.27,0.79) |        |
| Alcohol intake    |    |          |                  | 0.321  |
| No                |    |          |                  |        |
|                   | Q2 | 254/837  | 1.17 (0.85,1.59) |        |
|                   | Q3 | 202/834  | 0.69 (0.48,1.02) |        |
|                   | Q4 | 200/820  | 0.76 (0.52,1.10) |        |
| Yes               |    |          |                  |        |
|                   | Q2 | 342/1528 | 1.04 (0.81,1.34) |        |
|                   | Q3 | 271/1495 | 0.81 (0.58,1.12) |        |
|                   | Q4 | 205/1440 | 0.61 (0.43,0.87) |        |
| Physical activity |    |          |                  | 0.637  |
| No                |    |          |                  |        |
|                   | Q2 | 408/1341 | 1.06 (0.79,1.43) |        |
|                   | Q3 | 328/1233 | 0.72 (0.55,0.94) |        |
|                   | Q4 | 260/1052 | 0.71 (0.53,0.94) |        |
| Sometimes         |    |          |                  |        |
|                   | Q2 | 162/751  | 1.33 (1.01,1.76) |        |
|                   | Q3 | 118/784  | 0.87 (0.63,1.21) |        |
|                   | Q4 | 117/863  | 0.65 (0.45,0.95) |        |
| Often             |    |          |                  |        |
|                   | Q2 | 26/273   | 0.91 (0.44,1.89) |        |
|                   | Q3 | 37/312   | 0.94 (0.43,2.06) |        |
|                   | Q4 | 28/345   | 0.64 (0.25,1.61) |        |
| Sleep duration    |    |          |                  | 0.343  |
| 7-8 h             |    |          |                  |        |
|                   | Q2 | 268/1203 | 1.15 (0.86,1.54) |        |
|                   | Q3 | 238/1290 | 0.83 (0.59,1.16) |        |
|                   | Q4 | 203/1289 | 0.72 (0.51,0.99) |        |
| <7h/>8h           |    |          |                  |        |
|                   | Q2 | 328/1162 | 1.07 (0.84,1.37) |        |
|                   | Q3 | 235/1039 | 0.71 (0.48,1.06) |        |
|                   | Q4 | 202/971  | 0.62 (0.43,0.90) |        |
| Depress           |    |          |                  | 0.553  |
| No                |    |          |                  |        |

|              |    |          |                  |       |
|--------------|----|----------|------------------|-------|
|              | Q2 | 479/1980 | 1.11 (0.9,1.38)  |       |
|              | Q3 | 394/2007 | 0.76 (0.58,1.01) |       |
|              | Q4 | 341/1991 | 0.66 (0.51,0.87) |       |
| Yes          |    |          |                  |       |
|              | Q2 | 85/237   | 0.92 (0.42,2.01) |       |
|              | Q3 | 48/178   | 0.57 (0.36,0.91) |       |
|              | Q4 | 32/130   | 0.56 (0.26,1.23) |       |
| Hypertension |    |          |                  | 0.254 |
| No           |    |          |                  |       |
|              | Q2 | 273/1552 | 1.10 (0.86,1.39) |       |
|              | Q3 | 222/1507 | 0.80 (0.55,1.15) |       |
|              | Q4 | 170/1381 | 0.62 (0.45,0.84) |       |
| Yes          |    |          |                  |       |
|              | Q2 | 323/813  | 1.13 (0.81,1.59) |       |
|              | Q3 | 251/822  | 0.73 (0.52,1.02) |       |
|              | Q4 | 235/879  | 0.72 (0.54,0.96) |       |
| DM           |    |          |                  | 0.002 |
| No           |    |          |                  |       |
|              | Q2 | 380/2032 | 1.19 (0.94,1.50) |       |
|              | Q3 | 293/1991 | 0.81 (0.60,1.09) |       |
|              | Q4 | 248/1925 | 0.70 (0.52,0.93) |       |
| Yes          |    |          |                  |       |
|              | Q2 | 216/333  | 0.79 (0.50,1.26) |       |
|              | Q3 | 180/338  | 0.60 (0.40,0.88) |       |
|              | Q4 | 157/335  | 0.56 (0.37,0.86) |       |

**Notes:** Participants were categorized into four groups based on HEI-2015 dietary score quartile intervals, Q1,Q2,Q3, and Q4. Q1 served as the reference group when performing stratified analyses. All models were adjusted for adjusted for sex (men/women), marriage (married/other), income (low/high), smoke (no/current and past), alcohol intake (yes/no), physical activity(no/sometimes/often), sleep duration(7-8 hours/ <7 or >8 hours), BMI, diabetes, hypertension, and depression. If the factor was subgroup stratified, it was not adjusted.

**Table. S8** Association between AHA dietary scores and accelerated aging (Kailuan cohort)

|       | Case/N     | Model A          |                | Model B          |                | Model C          |                |
|-------|------------|------------------|----------------|------------------|----------------|------------------|----------------|
|       |            | OR (95% CI)      | <i>P-value</i> | OR (95% CI)      | <i>P-value</i> | OR (95% CI)      | <i>P-value</i> |
| Score |            |                  |                |                  |                |                  |                |
| 0-2   | 2553/22807 | reference        |                | reference        |                | reference        |                |
| 3-5   | 935/10894  | 0.74 (0.69-0.81) | <0.001         | 0.72(0.66-0.79)  | <0.001         | 0.81(0.74-0.89)  | <0.001         |
| Score |            |                  |                |                  |                |                  |                |
| 0     | 1251/10596 | reference        |                | reference        |                | reference        |                |
| 1     | 943/8691   | 0.91 (0.83-0.99) | 0.038          | 0.82 (0.74-0.90) | <0.001         | 0.88 (0.79-0.98) | 0.015          |
| 2     | 359/3520   | 0.85 (0.75-0.96) | 0.009          | 0.73(0.64-0.83)  | <0.001         | 0.79 (0.69-0.91) | 0.001          |
| 3     | 757/9377   | 0.66 (0.60-0.72) | <0.001         | 0.58 (0.52-0.65) | <0.001         | 0.70 (0.62-0.78) | 0.001          |
| 4     | 175/1497   | 0.99 (0.81,1.17) | 0.896          | 0.81 (0.68-0.97) | 0.025          | 0.90 (0.75-1.08) | 0.275          |
| 5     | 3/20       | 1.32 (0.31-3.93) | 0.659          | 1.29 (0.30-3.93) | 0.684          | 1.60 (0.37-4.90) | 0.461          |

**Notes:** Data are presented as hazard ratios (95% confidence intervals). Model A: unadjusted; Model B: adjusted for sex (men/women), marriage (married/other), income (low/high), smoke (no/current and past), alcohol intake (yes/no), sedentary lifestyle(yes/no), physical activity(no/sometimes/often), and sleep duration(7-8 hours/<7 or >8 hours); Model C: additionally adjusted for diabetes and hypertension based on Model B. OR, odds ratio; CI, confidence interval; *P-value*, probability.



**Figure. S1** Association of food composition and accelerated aging in the AHA dietary score (NHANES cohort, n=9285)

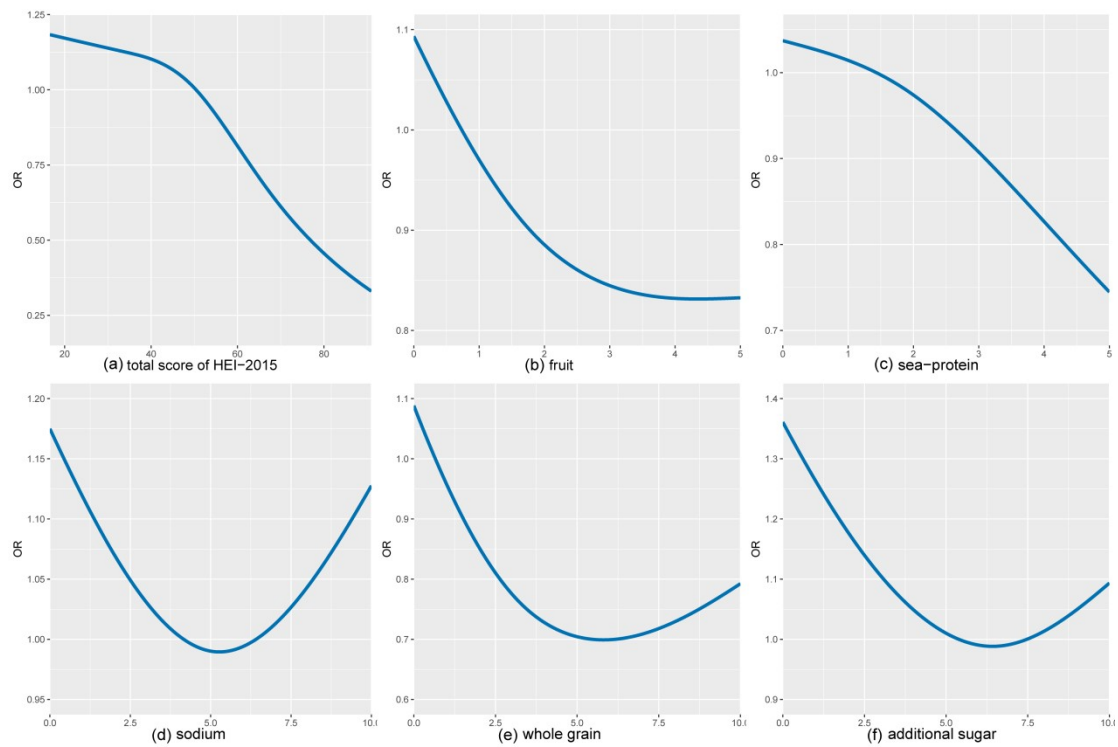

Notes: HEI-2015, Healthy Eating Index-2015; OR, odds ratio.
